# Supplementary material for: Long-Term Culture Captures Injury-Repair Cycles of Colonic Stem Cells
Source: PubMed Central journal article supplement (PMC6904908; doi:10.1016/j.cell.2019.10.015), 2019-11-14
Supplement: mmc7.pdf [file mmc7.pdf]

## Table S7 QPCR Primers, Related to STAR methods

|            |                          |
|------------|--------------------------|
| Anxa1-F    | TCTGACCAGCAGGAGCTTTC     |
| Anxa1-R    | TGGCTTCGTACAGCTTCTCG     |
| Anxa8-F    | AGCGGATTCTGGTGTGTCTC     |
| Anxa8-R    | TCCCATAATCTTCTCACCCGC    |
| Ly6a-F     | AGCTCCAAGGTGGGAGTAGT     |
| Ly6a-R     | AGGGTCATGAGCAGCAATCC     |
| Ly6g-F     | GAGAGGAAGTTTTATCTGTGCAGC |
| Ly6g-R     | TCTCAGGTGGGACCCCAATA     |
| Tacstd2-F  | TCACCAAACGGAGGAAGTCG     |
| Tacstd2-R  | GAAGTCGGGGCATCCTACAG     |
| Atf3-F     | AGAGCTGAGATTCGCCATCC     |
| Atf3-R     | TTGTTTCGACACTTGGCAGC     |
| Ero1L-F    | GAATGTGAGCAAGCTGAGCG     |
| Ero1L-R    | CATACTCAGCATCGGGGGAC     |
| Gadd34-F   | CACGATCGCTTTTGGCAACC     |
| Gadd34-R   | TAGAAGTTGTGGGCGTCCCT     |
| Hsp90ab1-F | GGCTATCCCATCACCCCTCTATTT |
| Hsp90ab1-R | GGCTTCTCCTCATCCTCCTTATC  |
| Sdha-F     | GGTGAGAACAAGAAGGCATCAG   |
| Sdha-R     | GCCTACAACCACAGCATCAAA    |
| Bnip3-F    | GCTTTGGCGAGAAAAACAGC     |
| Bnip3-R    | ATGCTGAGAGTAGCTGTGCG     |
| Ddit3-F    | CCACCACACCTGAAAGCAGAA    |
| Ddit3-R    | AGGTGAAAGGCAGGGACTCA     |
| Ddit4-F    | CTTGTCCGCAATCTTCGCTG     |
| Ddit4-R    | TGGCTGCTAAGGTCCGAATG     |
| Slc2a1-F   | CGGGGTCTTAAGTGCGTCA      |
| Slc2a1-R   | ATAGCCGAACTGCAGTGATCC    |
| sXbp1-F    | CTGAGTCCGCAGCAGGTG       |
| sXbp1-R    | GTCCATGGGAAGATGTTCTGG    |
| Vegfa-F    | CACAGCAGATGTGAATGCAG     |
| Vegfa-R    | TTTACACGTCTGCGGATCTT     |
| P4hb-F     | GACTCAAGCGAAGTGACGGT     |
| P4hb-R     | TCAAAGTTGTTGCGGCCTTC     |
